# Supplementary material for: Decoupling of dissolved organic matter patterns between stream and riparian groundwater in a headwater forested catchment
Source: Copernicus journal article supplement (doi:10.5194/hess-22-1897-2018), 2018-03-19
Supplement: Supplementary file 2 [file hess-22-1897-2018-supplement.zip]

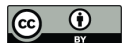

*Supplement of*

**Decoupling of dissolved organic matter patterns between stream and  
riparian groundwater in a headwater forested catchment**

**Susana Bernal et al.**

*Correspondence to:* Susana Bernal ([sbernal@ceab.csic.es](mailto:sbernal@ceab.csic.es))

- [hess-22-1897-2018-supplement-title-page.pdf](#)
- [Data\\_Bernal\\_etal.xlsx](#)
- [Supplement.pdf](#)

The copyright of individual parts of the supplement might differ from the CC BY 4.0 License.
